# Supplementary material for: What it Takes to Implement Population-Based Genomic Screening: A Multi-Site Qualitative Study of Implementation Determinants Across Health Systems
Source: Research Square preprint supplement (doi:10.21203/rs.3.rs-9418493/v1), 2026-05-11
Supplement: Supplementary file 1 [file a8f16005d9d68c7226fdef1f.docx]

***FOCUS Site Without Program Study Team Interview Script***

***Research Questions to Consider When Completing the Interview:*** *to keep in mind when considering how to use the questions and focus the interview.  Our goal is to create a process map of the workflow for each site.*

1. *Assess variability in PGS implementation process*
2. *What distinguished between institutions at various stages of implementation?*
3. *What is necessary for institutions to have optimal implementation of PGS?*

***Defining PGS:***

PGS = the screening of unaffected adults for, at least, CDC Tier 1 conditions

***General Overview of Interview:***

*Brief summary of what will be asked (for the purposes of the interview team).*

**SITE WITHOUT PROGRAM Questions**

1. Please introduce yourself and your role at your organization? **(Individual characteristics: knowledge and beliefs about the intervention)**
2. What do you and others at your institution know about PGS? **(Individual characteristics: knowledge and beliefs about the intervention)**
3. What is the current process for genetic testing at your organization? **(Intervention characteristics: design quality and packaging)**
4. What do you think about routine PGS for all populations? **(Intervention characteristics: relative advantage)**
5. Are there similar PGS programs that have been implemented in your system? **(Inner setting)**

- How could these be leverage to implement PGS?

1. When/why might patients get PGS at your institution? **(Outer setting: patient needs and resources)**
2. How does your organization support change or new programs in general? **(Inner setting: culture)**

- Are changes easy or difficult to make?
- What is the leadership involvement in supporting new programs?
- Who are the key people at your institution that would need to be involved in the decision of whether or not to adopt PGS?

1. How would your organization support a PGS program? **(Inner setting: culture)**
2. What do you think are the most important factors at your institution when making the decision to adopt PGS? **(Inner setting: available resources)**

- What might convince people that PGS would be a good idea?
- What patient factors would need to be considered?
- What evidence would need to be presented?

1. Are there any competing priorities that would make it difficult to implement a new program? **(Inner setting: available resources)**
2. How are other similar programs maintained and changed over time? **(Process: reflecting and evaluating)**

- Who ensures the program is maintained?

1. If you were to decide to implement PGS, could you describe the process of implementation? **(Process: engaging champions)**

- How would the program be supported financially?
- How would you market the program?
- How would you collect samples?
- How would you return results?
- What would a successful PGS program look like at your organization?

1. What would be most helpful for recruitment and how are you planning to address recruitment?
2. What would be most helpful for retention and how are you planning to address retention?
3. What would be most helpful for sample collection and how are you planning to address sample collection?
4. What would be most helpful for return of results and how are you planning to address return of results?
5. What are the three most important things your organization would need to implement PGS? **(Inner setting: available resources)**

- What makes these so important? How could they be addressed?

1. Do you have any additional comments that you would like to make before we conclude this interview? **(Process: reflecting and evaluating)**
2. Who else should we talk with at your site about PGS implementation?

***FOCUS Site With Program Study Team Interview Script***

***Research Questions to Consider When Completing the Interview:*** *to keep in mind when considering how to use the questions and focus the interview. Our goal is to create a process map of the workflow for each site.*

1. *Assess variability in PGS implementation process*
2. *What distinguished between institutions at various stages of implementation?*
3. *What is necessary for institutions to have optimal implementation of PGS?*

***General Overview of Interview:*** *Brief summary of what will be asked (for the purposes of the interview team).*

1. *Who are you?*
2. *Fit of PGS in your organization*
3. *Has your organization implemented it?*

| ***Yes*** | ***No*** |
| --- | --- |
| Describe the program | Describe current process |
| What is being measured? What is success? | What would success look like? |
| How is it maintained? | What would it take to sustain/maintain? |
| Describe inner setting/change infrastructure. | Describe inner setting/change infrastructure that is hindering or could help if leveraged |
| Describe tension for change and competing demands that were overcome or synergies that were leveraged | Describe tensions for change and competing demands that are hindering and any synergies that could be leveraged |
| What are the three most important thing | What do you think are the three most important things needed to implement |
| Any other barriers/facilitators/needs | Anything else a barrier/facilitator/used for leverage/needed? |

***Introduction:***

*Thank you for agreeing to participate in the FOCUS study. The goal of today is to identify, refine, and share strategies for improving the implementation of Population Wide Genomic Screening programs (PGS). We’ll spend the next 60 minutes discussing your experiences, thoughts, and approaches that your program has used to implement PGS.*

***Background Information:***

*The purpose of this interview is to identify barriers and facilitators for implementing PGS programs at clinical institutions. As a member of the implementation team, your perspective is crucial and will help us in this endeavor. The following questions will be open ended and we would greatly appreciate as much detail and information that you can provide in your responses. You are not required to answer any of these questions and you are allowed to stop at anytime. Do you have questions for me before we begin?*

*We would like to record this session. Are you comfortable with me starting the recording?*

**SITE WITH PROGRAM Questions**

**Introduction & General Role**

1. Please introduce yourself and your role at your organization? **(Inner setting: networks and communication)**
2. What do you and others at your institution know about PGS? **(Individual characteristics: knowledge and beliefs)**
3. What do you think about routine PGS for all populations? **(Intervention characteristics: relative advantage)**

**Program Overview**

1. Your role within your PGS program? How long have you been in your current position? **(Inner setting: network and communication)**
   - Probe: Were you involved in the decision of whether or not to adopt PGS?
   - Probe: Were you involved in the planning and set up of the PGS program?
   - Probe: What day-to-day tasks do you do in relation to the PGS program?
2. Could you give us the basic details about your PGS program such as how it was implemented, when, and any other details that are important to you? **(Intervention characteristics: design, quality, and packaging)**
   - Probe: Is your program integrated into clinical workflows?
3. Could you tell me about your PGS program’s funding source or sources? **(Inner setting: available resources)**
4. What genes/conditions is this PGS program screening for? **(Intervention characteristics: evidence strength and quality)**
5. Who owns the data that is generated by the program? **(Intervention characteristics)**

**Adoption Decision**

[IF INVOLVED IN ADOPTION DECISION]

1. Do you recall who had the initial idea to implement PGS? **(Process: engaging champions)**
   - Probe: Who was most essential in making the decision to adopt?
2. How did the key people come together? **(Process: engaging formally appointed implementation leaders)**
3. What was most influential in the decision making to start the program? **(Process: planning)**
4. What patient factors were considered, if any? **(Intervention characteristics: patients needs and resources)**
5. Did competition from other hospitals or external pressures play a role? **(Outer setting: external policies and incentives)**

**Implementation Process**

1. Were the same people who decided to adopt PGS also involved in the implementation? **(Process: engaging implementation leaders)**
2. Was there a clear leader to ensure that the program got going? How were they appointed **(Process: engaging implementation leaders)**
3. Where did you find information for how to set up the program? What information sources were most helpful? **(Intervention characteristics: evidence strength and quality)**
4. Was there any information you wish you had during the implementation? **(Intervention characteristics)**
5. What were the greatest challenges you had in setting up the program? How did you overcome them? How long did it take to overcome them? **(Process: executing)**
6. How sufficient have the resources been to implement PGS? **(Inner setting: available resources)**
   1. What resources have been most helpful?
7. [IF PROGRAM HAS BOTH RESEARCH AND CLINICAL OFFERINGS] - Why and/or how did the institution decide to transition from a research offering to a clinical offering?

**Workflow Overview**

1. Is your screening program integrated into the clinical workflow? **(Inner Setting: Structural characteristics)**
   1. How is it integrated?
2. What would it take to shift into clinical workflows? Primary care? **(Outer setting: external policy and incentives)**

**Marketing & Outreach**

1. Could you tell us about how marketing works at your PGS program? **(Outer setting?)**
2. Could you tell us how your PGS program conducts outreach to prospective patients? **(Outer setting?)**
3. What helped the most for recruitment?
4. What helped the most for retention?

**Sample Collection & Results**

1. How does your PGS program collect samples? **(Intervention characteristics)**
   - Probe: Are samples collected in tandem with other provider visits or are sample collections unique visits in and of themselves?
   - Probe: Is your program collecting saliva, blood, or both for samples?
2. In your estimation, how quickly are results returned to patients? **(Intervention characteristics)**
3. How are results returned to patients? **(Intervention characteristics)**
   - Probe: what happens is someone cannot be reached to return results?
4. What happens after a participant screens positive? **(Intervention characteristics)**
   - Probe: How is the management of return of results and ongoing communication handled in PGS?
   - Probe: Who discloses screening results to patients?
   - Probe: Are there additional tests performed?
5. What happens after a patient screens negatives? **(Intervention characteristics)**
   - Probe: Where do the results go?
   - Probe: Are providers or patients informed?
   - Probe: Who decides if they should have follow-up?
6. What helped the most for sample collection?
7. What helped the most for return of results?

**Program Alignment with Population and Adaptability**

1. How well aligned do you think your program is to the population you serve? **(Outer setting: patient needs and resources)**
2. What external relationships or partnerships have you developed throughout the execution of the PGS program? **(Outer setting: cosmopolitanism)**
3. How adaptable do you think your program has been? **(Intervention characteristics: adaptability)**
4. Who makes decisions about changes? **(Process: engaging formally appointed implementation leaders)**

**Program Success and Outcomes**

1. How is program success determined? **(Process: evaluating)**
2. What specific metrics do you have in place to track progress? **(Process: evaluating)**
3. Who determines success? **(Process: evaluating)**
4. What is going well? **(Process: evaluating)**
5. What is not going well? **(Process: evaluating)**
6. Do you collect any information (quantitative or qualitative) about your PGS program? **(Process: evaluating)**
7. Do you report any information (quantitative or qualitative) about your PGS program? **(Process: evaluating)**
8. What (if any) patient feedback have you received? **(Process: evaluating)**
   - Probe: How do patients respond to the program?
   - Probe: How do you integrate this feedback into your program?

**Closing**

1. Now that we have covered all of the questions on my end, I want to conclude by asking what you think were the three most important keys to successful implementation of PGS? **(Process: reflecting and evaluating)**
   - What makes these so important? How could these be addressed?
2. Do you have any additional comments that you would like to make before we conclude this interview? **(Process: reflecting and evaluating)**
3. Who else should we talk with at your site about PGS implementation?

**ITM Member Checking Interview Guide**

***Introduction:***

The purpose of this group interview is to resolve any discrepancies and gain any clarity from the interviews that we have individually had with this group. We will be basing this discussion primarily off of the process map that we sent you all earlier this week.

***Consent & Payment Disclosure:***

Before we begin, I’d like to ask your permission to audio-record this interview. The recording will be used to ensure we accurately capture your responses. The recording will be stored securely and transcripts will be de-identified to maintain privacy. Do you consent to be recorded today?

*If participants agree:* Great, I will begin the recording now. I also wanted to note that all individuals who participate in this member checking interview will receive $50 compensation for their time.

***Defining PGS:***

Today’s discussion will focus on the hypothetical *(for exploring sites* ***only****)* population genomic screening program we previously discussed with individuals at your site. For this project, we are defining population genomic screening (PGS) as the clinical implementation of proactive CDC Tier 1 screening. Do you have any questions about PGS before we continue?

Our plan for today is to review the facilitators, challenges, strategies, and processes we gathered from interviews with individuals at your site. We would like your feedback on whether the information we present feels accurate to you. We have also identified outstanding questions and discrepancies that we’re hoping to discuss with you to gain additional clarity.

***Discrepancies:***

During the discrepancy resolution part of the member checking, we are aiming to resolve any conflicting information that we have obtained during individual interviews. For example, Person 1 may say that a study coordinator is involved in the return of results process. On the other hand, Person 2 may say that this is actually the responsibility of the genetic counselor(s). To resolve this, we would ask you all, as a group, who’s responsibility return of results is.

***Clarity:***

During the clarity discussion, we will be attempting to find answers to any knowledge gaps that we may have. For example, some PGS programs have dedicated databases that house the study data. Upon interviewing individuals from a program, we may not have an answer to whether or not this database links/is integrated with the institutional EHR system. This time would be when knowledge of this integration could be discussed.

***Resources/Educational Materials:***

As part of our analysis of your program, we have reviewed your PGS program’s website (where available) and compared the resources available therein to other programs’ websites. With this in mind, does your program have any available resources that are not shared on the website? If so, would you share these materials with us?

***Member Checking Questions (note: “hypothetical” and “anticipated” should be used when speaking to sites in the exploring stage who do not have a PGS program)***

*If sustaining site, ask interviewees to clarify how they would differentiate implementing from sustaining. When discussing facilitators, challenges, and strategies, ask if there are any that were/will be particularly important during implementation or sustainment.*

1. *(Anticipated) facilitators*: Next, we’ll look at the list of facilitators identified in interviews. Facilitators were viewed as factors that support the successful adoption, implementation, or sustainability of a PGS program.
   1. Does this list feel accurate to you?
   2. Are there any facilitators you would like to add to the list?
   3. Any on the list you’d like to remove?
2. *(Anticipated) challenges:* Let’s begin with the list of (hypothetical) challenges we shared with you ahead of today’s call. These were identified as barriers your team might face/has faced in implementing a PGS program. Please note that this list reflects the study team’s interpretation of themes that emerged from discussions with individuals at your site, so they may not reflect the nuances of the feedback you shared. If you feel any of the bullets do not accurately reflect your perception of site challenges, we want to know that.
   1. Does this list feel accurate to you?
   2. Are there any challenges you think are missing? Any on the list you’d like to remove?
   3. How would/has your site tried to address these challenges in implementing a PGS program?
3. *(Hypothetical) implementation strategies:* During your interviews, you also identified a list of strategies to improve the adoption, implementation, or sustainability of a PGS program at your site.
   1. Are there any other strategies you would suggest adding to the list?
      1. *If planning, implementing, or sustaining site, probe:* Any new strategies your team has used?
   2. Are there any strategies you would remove from the list?
      1. *If planning, implementing, or sustaining site, probe:* Are there any strategies that we listed that you found to ultimately not be effective since we first interviewed you?
4. *Performance objectives:* Based on our individual interviews that we conducted with your team, along with other sites in the *(planning, implementing, sustaining*) stage, we made a list of performance objectives that we identified as critical components that must take place to support adoption (and implementation *for planning, implementing and sustaining sites*) of a PGS program. These objectives include X, Y, & Z.
   1. Are there any other objectives that you would add to this list? / that we are missing?
   2. Are there any objectives that you think should not be included?
5. *RE-AIM outcomes:* We also identified a list of outcomes and metrics your site might use/has used to measure the success of a PGS program.
   1. Are there any measures that are missing?
   2. Do you have anything to share about the measures we’ve included on the list?
   3. Have these measures changed since we first interviewed individuals at your site?
6. *Process maps:* From the interviews that we had individually, we created process maps and consolidated each of the individual process maps into a site-specific process map. The process maps are meant to illustrate a/the PGS program at your site, from pre-adoption decision through the testing process in clinics.

(*For implementing and sustaining sites):* Before walking through your site’s specific map, we’d like to show you a high-level pre-adoption decision map our team developed from interviews with various sites.

- 1. Do these high-level steps feel accurate to the pre-adoption decision process at your site?
  2. What would you change?

Now, we’ll look at your site’s map. While consolidating your site’s process map, we identified a few inconsistencies and questions that we wanted to discuss with you today.

- 1. *Facilitator walks participants through each sticky note on the consolidated map and seeks clarification. If able, facilitator makes notes on process maps in real time. Notetaker also records discussion in notes.*
  2. Looking at the map as a whole, are there any roles/employees that we missed in this process map?

***Conclusion:*** Thank you for the feedback and insights you shared today. Before we end, is there anything else that anyone would like to share today that you feel we did not cover already?

You will receive a $50 digital gift card in your email in the next [week]. If you have any questions or have any issues accessing it, please email _____ (Jarrod?).

Additional Cost-related Questions (if have time)

1. *Personnel & Team:*
   1. How many team members are involved in the PGS program?
      1. How does that number break down across teams (i.e. genetic counseling, physicians, IT, study team, etc.)?
2. *Costing & Funding:*
   1. Group Interviewee X – how many hours of your full time effort do you allocate to the PGS program?
   2. Group Interviewee Y – how many hours of your full time effort do you allocate to the PGS program?
   3. Group Interviewee Z – how many hours of your full time effort do you allocate to the PGS program?
   4. Before the implementation of your program, how would you describe the rate of genetic testing completion at your institution?
   5. After the implementation of your program, how would you describe the rate of genetic testing completion at your institution?
   6. Are any of you aware of any positive monetary effects that your program either directly (i.e. engaging existing/new patients with the health system) or indirectly (i.e. auxiliary services like mammography or colonoscopies) creates?
